# Supplementary material
Source: publisher site journal article supplement (https://www.dovepress.com/article/126370)
Supplement: Supplementary file 1 [file get_supplementary_file.php]

# Supplementary Material

**Figure S1.** Medical record extraction form for dermatologic events.

**Dermatologic**

STUDY ID  Patient initials  Adjudicator's initials

Chart review date  Check box if adjudicator is BLIND to patient's use of osteoporosis medications

**CASE CONFIRMATION STATUS (REQUIRED)**  
 1= DEFINITE CASE, 0=DEFINITE NONCASE;  
 8=PROBABLE CASE; 9=CANNOT DETERMINE

**DEFINITE OR PROBABLE (CASE CONFIRMATION STATUS = 1 OR 8) PLEASE FILL THE FIELDS BELOW**

If definite/probable, date of diagnosis

Was dermatologic event the primary reason for hospitalization/ER/visit? (1=yes, 0=no, 9=unable to determine. IF NOT CONFIRMED ENTER=9)

If unknown primary or not, please explain

**Which of the following was used to confirm the case? (please check all that apply)**

Clear indication in treating physician's notes

Text description/narrative

Laboratory test results

Symptoms

Please specify symptoms (free text)

Diagnostic (ICD-10) code

List one specific code (e.g., E835)

**Was any of the following specific subtypes diagnosed?**

Erythema multiforme

Stevens-Johnson syndrome

Toxic epidermal necrolysis

Bullous adverse event

Serious erythematous adverse event

Other dermatologic adverse event

Specify (free text)

**Treatment with the following medications (please check all that apply)**

Steroids

Antihistamines

Other medications

Specify other medications (free text)

Clinical diagnosis that confirmed the case (free text)

Department/specialist whose records confirmed the case (select from list)

If not listed, specify (free text)

Setting in which case was diagnosed (select)

**If case is NOT CONFIRMED (CASE CONFIRMATION STATUS = 0 OR 9), PLEASE FILL THE FIELDS IN THE BLUE FRAME otherwise leave blank**

Dermatologic event was secondary to another condition

Specify the condition (free text)

Patient was given an alternative diagnosis

Specify the alternative diagnosis (free text)

Coding error

Was information sufficient for adjudication? (1=yes, 0=no)

If insufficient, what information was missing? (free text)

Please provide a BRIEF narrative of the case (in English) ONLY if not reflected by structured data

**Figure S2. Medical record extraction form for hypersensitivity**

**Hypersensitivity**

STUDY ID  Patient's initials

Date of adjudication  Adjudicator's initials

Check box if adjudicator is BLIND to patient's use of osteoporosis medications

**CASE CONFIRMATION STATUS (REQUIRED) 1= DEFINITE CASE, 0=DEFINITE NONCASE; 8=PROBABLE CASE; 9=CANNOT DETERMINE**

**IF DEFINITE OR PROBABLE (CASE CONFIRMATION STATUS = 1 OR 8) PLEASE FILL THE FIELDS BELOW**

Date of diagnosis, if definite/probable case

Was hypersensitivity the primary reason for hospitalization/ER/visit? (1=yes, 0=no, 9=unable to determine. IF NOT CONFIRMED ENTER=9)

If unknown whether primary or not, explain

**Which of the following was used to confirm the case? (please check all that apply)**

Clear indication in treating physician's notes

Text statement/narrative

Laboratory test results

Diagnostic (ICD-10) code

List specific ICD-10 code (e.g., E835)

**Did patient have any of the following? (please check all that apply)**

Acute onset of symptoms (minutes or hours)

Specify symptoms (free text)

Low blood pressure

Was there a known allergen?

Specify the allergen

Eosinophilia

Arthropathy

Anaphylaxis

Other type of hypersensitivity reaction

Specify other hypersensitivity reaction (free text)

**Were the following medications administered? Please check all that apply**

Epinephrine

Antihistamines

Corticosteroids

Beta-agonists

What clinical diagnosis confirmed the case?

Department/specialist clinic whose records confirmed the case

Specify department if not listed

Setting in which case was diagnosed (select from list)

**If case is NOT CONFIRMED (CASE CONFIRMATION STATUS = 0 OR 9), PLEASE FILL THE FIELDS IN THE BLUE FRAME otherwise leave blank**

Hypersensitivity was secondary to another condition

Specify the condition

Patient was given an alternative diagnosis

Specify alternative diagnosis

Coding error

Was information sufficient for adjudication?

If not sufficient, what information was missing?

Brief narrative of the case (in English) ONLY if not reflected by structured data

**Table S1.** Case algorithm for osteoporosis diagnosis

| <b>ICD-10 Code</b>                                                                                                                                                             | <b>Description</b>                                                                                                                                                                                                                       |
|--------------------------------------------------------------------------------------------------------------------------------------------------------------------------------|------------------------------------------------------------------------------------------------------------------------------------------------------------------------------------------------------------------------------------------|
| M80, M81, M82                                                                                                                                                                  | Osteoporosis                                                                                                                                                                                                                             |
| Case Algorithm for Osteoporotic Fracture Diagnosis defined by any of the following:                                                                                            |                                                                                                                                                                                                                                          |
| Denmark:                                                                                                                                                                       |                                                                                                                                                                                                                                          |
| S72.x*, S52.x, S12.0, S12.1, S12.2, S12.7, S12.9, S22.0, S22.1, S32.x, S42.2, S42.3, S42.4, S42.7, S42.8, T08                                                                  | Fracture of hip, radius/ulna, spine, pelvis, femur or humerus.<br><br>The supplementary character positions which indicate open fractures are not used in Denmark.                                                                       |
| Sweden:                                                                                                                                                                        |                                                                                                                                                                                                                                          |
| S72.x, S52.x, S12.0, S12.1, S12.2, S12.7, S12.9, S22.0, S22.1, S32.x, S42.2, S42.3, S42.4, S42.7, S42.8, T08                                                                   | Fracture of hip, radius/ulna, spine, pelvis, femur or humerus, excluding open fractures whenever possible                                                                                                                                |
| Excluding                                                                                                                                                                      |                                                                                                                                                                                                                                          |
| S72.x1, S52.01, S52.11, S52.21, S52.31, S52.41, S52.71, S52.81, S52.91, S12.01, S12.11, S12.21, S12.71, S12.91, S22.01, S22.11, S32.x1, S42.21, S42.31, S42.41, S42.71, S42.81 |                                                                                                                                                                                                                                          |
| Note: One of the above codes for osteoporotic fracture diagnosis AND no concurrent major trauma NOMESCO codes (for Denmark) or ICD-10 trauma codes (Sweden)                    |                                                                                                                                                                                                                                          |
| <b>NOMESCO codes (Denmark)</b>                                                                                                                                                 | <b>Descriptions</b>                                                                                                                                                                                                                      |
| EUP2-EUP9                                                                                                                                                                      | Mode of transport: bicycle, moped, motorcycle, motor scooter, passenger car, van, pickup truck, lorry, truck, bus, other specified and unspecified                                                                                       |
| EUM2-EUM9                                                                                                                                                                      |                                                                                                                                                                                                                                          |
| EUHE01-EUHE09                                                                                                                                                                  | Falls, all other than falls on the same level                                                                                                                                                                                            |
| AUHG02, EUHB, EUHC, EUHD                                                                                                                                                       | Other accidents: Contact or collision with animal; collapse, breakage and deformation of material; malfunction and loss of control of machinery, equipment and materials; malfunction and loss of control of transport vehicle machinery |
| <b>ICD-10 codes (Sweden)</b>                                                                                                                                                   | <b>Descriptions</b>                                                                                                                                                                                                                      |
| V01-V99                                                                                                                                                                        | Transport accidents                                                                                                                                                                                                                      |
| W02, W04-W17, W19                                                                                                                                                              | Falls, all other than falls on the same levels                                                                                                                                                                                           |

W20-W49 Accidents due to exposure to inanimate mechanical forces

W50-W64 Accidents due to exposure to animate mechanical forces

**Case Algorithm for Osteoporosis Medications:**

| ATC Code                 | ATC Description                            |
|--------------------------|--------------------------------------------|
| M05BA, M05BB             | Bisphosphonate prescription                |
| G03XC01                  | Raloxifene                                 |
| M05BX01                  | Ipriflavone                                |
| M05BX03                  | Strontium ranelate                         |
| M05BX04                  | Denosumab                                  |
| H05AA                    | Teriparatide or parathyroid hormone        |
| H05BA                    | Calcitonin                                 |
| Treatment Code (DK only) | Description                                |
| BWHB40, BWHB40A          | Treatment with bisphosphonates in hospital |

---

**Note:** <sup>a</sup> x indicates any digit from 0 - 9 available in the coding system

**Table S2.** Algorithm for exclusion criteria among postmenopausal osteoporotic women

| <b>Diagnosis</b>                                                   | <b>Code Type</b>                              | <b>Codes and Descriptions<sup>b</sup></b> |
|--------------------------------------------------------------------|-----------------------------------------------|-------------------------------------------|
| Cancer diagnosis (excluding non-melanoma skin cancer) <sup>a</sup> | ICD-10 in the National Registries of Patients | C00xx – C43xx, C45xx – C97xx              |
| Paget’s disease                                                    | ICD-10 in the National Registries of Patients | M88.xx                                    |

**Notes:** <sup>a</sup>Outpatient or discharge diagnosis; <sup>b</sup> This algorithm includes codes for secondary (metastatic) malignancies.

**Table S3.** Diagnoses used to identify dermatologic events leading to hospitalization or emergency room visits.

| <b>ICD-10 Code</b>               | <b>Description</b>                                 |
|----------------------------------|----------------------------------------------------|
| L10xx                            | Pemphigus                                          |
| L12xx                            | Pemphigoid                                         |
| L13xx                            | Other bullous disorders                            |
| L14xx                            | Bullous disorders in diseases classified elsewhere |
| L50xx                            | Urticaria                                          |
| L511x                            | Bullous erythema multiforme                        |
| L512x                            | Toxic epidermal necrolysis [Lyell]                 |
| L518x                            | Other erythema multiforme                          |
| L519x                            | Erythema multiforme, unspecified                   |
| L538x                            | Other specified erythematous condition             |
| R21xx                            | Rash and other nonspecific skin eruption           |
| <b>Bullous events</b>            |                                                    |
| L10xx                            | Pemphigus                                          |
| L12xx                            | Pemphigoid                                         |
| L13xx                            | Other bullous disorders                            |
| L14xx                            | Bullous disorders in diseases classified elsewhere |
| <b>Erythematous events</b>       |                                                    |
| L511x                            | Bullous erythema multiforme                        |
| L512x                            | Toxic epidermal necrolysis [Lyell]                 |
| L518x                            | Other erythema multiforme                          |
| L519x                            | Erythema multiforme, unspecified                   |
| L538x                            | Other specified erythematous condition             |
| <b>Other dermatologic events</b> |                                                    |
| L50xx                            | Urticaria                                          |
| R21xx                            | Rash and other nonspecific skin eruption           |

**Table S4.** Diagnoses used to identify hypersensitivity leading to hospitalization or emergency room visits.

| <b>ICD-10 Code</b>                   | <b>Description</b>                                                                           |
|--------------------------------------|----------------------------------------------------------------------------------------------|
| D721x                                | Eosinophilia (Eosinophilia: allergic, hereditary)                                            |
| M364x                                | Arthropathy in hypersensitivity reactions classified elsewhere                               |
| M022x                                | Postimmunization arthropathy                                                                 |
| T782x                                | Anaphylactic shock, unspecified                                                              |
| T886x                                | Anaphylactic shock due to adverse effect of correct drug or medicament properly administered |
| T887x                                | Unspecified adverse effect of drug or medicament                                             |
| T784x                                | Allergy, unspecified                                                                         |
| <b>Anaphylaxis Diagnosis Codes</b>   |                                                                                              |
| T886x                                | Anaphylactic shock due to adverse effect of correct drug or medicament properly administered |
| T782x                                | Anaphylactic shock, unspecified                                                              |
| <b>Other hypersensitivity events</b> |                                                                                              |
| D721x                                | Eosinophilia (Eosinophilia: allergic, hereditary)                                            |
| M364x                                | Arthropathy in hypersensitivity reactions classified elsewhere                               |
| M022x                                | Postimmunization arthropathy                                                                 |
| T887x                                | Unspecified adverse effect of drug or medicament                                             |
| T784x                                | Allergy, unspecified                                                                         |
